# Supplementary material
Source: publisher figshare collection journal article supplement (https://karger.figshare.com/articles/dataset/_/26181092)

Supplemental figure 1A


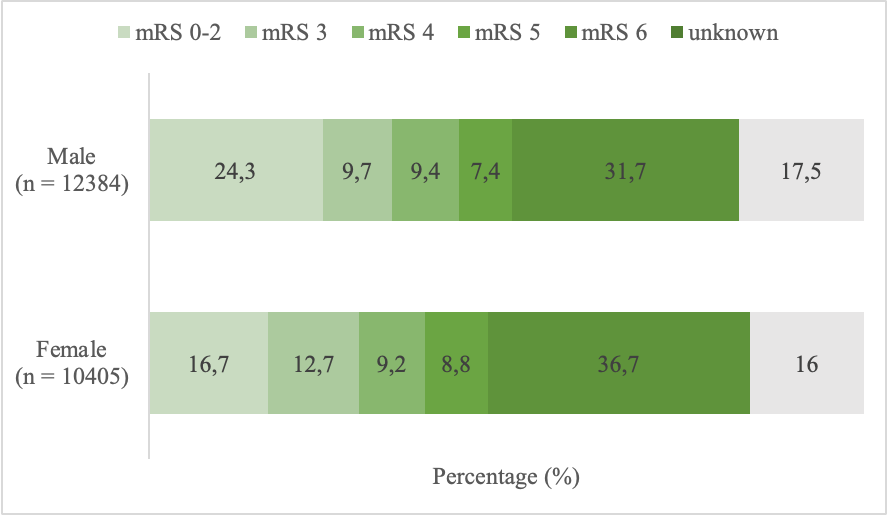


1B)


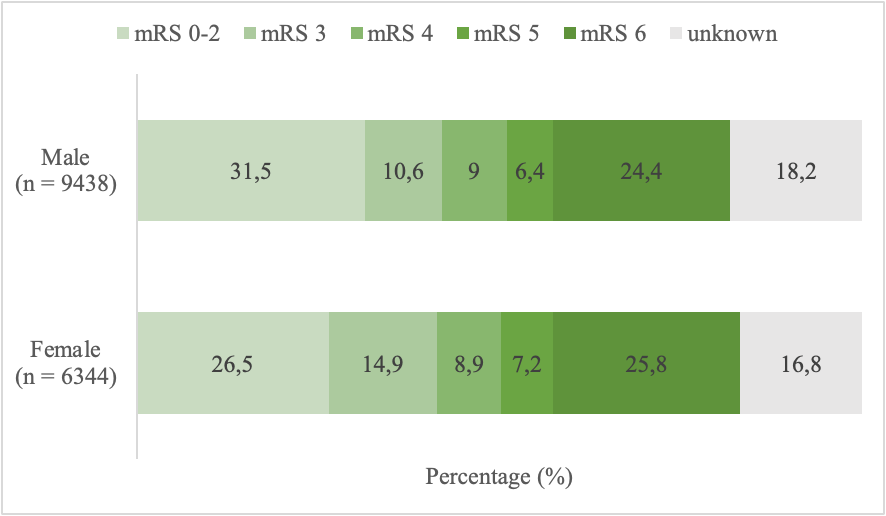


Supplemental figure 2


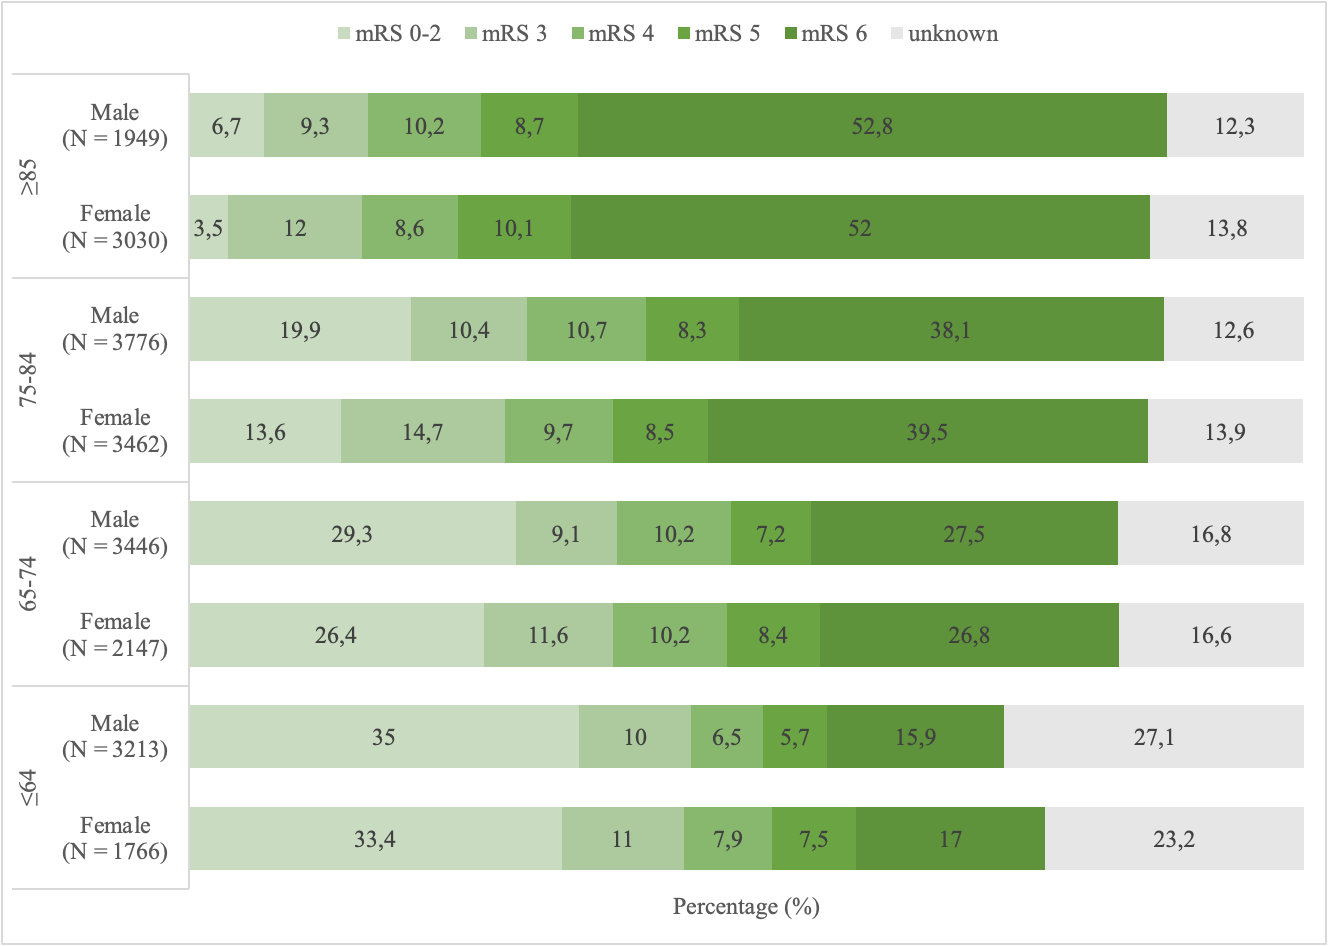

Supplement: Supplementary file 1 [file 9]
